# Supplementary material for: Health economic evaluation of strategies to eliminate gambiense human African trypanosomiasis in the Mandoul disease focus of Chad
Source: bioRxiv or medRxiv preprint supplement (doi:10.1101/2022.07.25.22278030), 2022-07-25
Supplement: Supplementary file [file media-3.pdf]

## Supporting Information

### Health economic evaluations of strategies to eliminate *gambiense* human African trypanosomiasis in the Mandoul disease focus of Chad

#### S3. Supplementary Results

##### Contents

|      |                                                                           |      |
|------|---------------------------------------------------------------------------|------|
| S3.1 | Supplemental results for the retrospective analysis . . . . .             | S3.2 |
| S3.2 | Supplemental results for the prospective analysis . . . . .               | S3.4 |
| S3.3 | Sensitivity analysis of time horizon and discounting rate . . . . .       | S3.6 |
| S3.4 | Sensitivity analysis: results if fexinidazole had been available. . . . . | S3.7 |
| S3.5 | Parameter-specific uncertainty analysis (retrospective analysis). . . . . | S3.8 |

##### List of Figures

|   |                                                                                                                                            |      |
|---|--------------------------------------------------------------------------------------------------------------------------------------------|------|
| A | Disability adjusted life-years (DALYs) accrued through time for different counterfactual strategies in the retrospective analysis. . . . . | S3.2 |
| B | Close-up of costs spent vs to spend in retrospective analysis . . . . .                                                                    | S3.3 |
| C | Disability adjusted life-years (DALYs) accrued through time for different counterfactual strategies in the prospective analysis. . . . .   | S3.4 |
| D | Uncertainty in cost-effectiveness for prospective strategies. . . . .                                                                      | S3.5 |
| E | Cost-effectiveness acceptability curves (CEACs) for retrospective strategies . . . . .                                                     | S3.6 |
| F | Expected value of perfect partial information (EVPPi) for retrospective analysis . . . . .                                                 | S3.8 |

##### List of Tables

|   |                                                                             |      |
|---|-----------------------------------------------------------------------------|------|
| A | Costs spent vs total costs for retrospective analysis. . . . .              | S3.2 |
| B | Sensitivity analysis if fexinidazole had been available since 2014. . . . . | S3.7 |

### S3.1 Supplemental results for the retrospective analysis

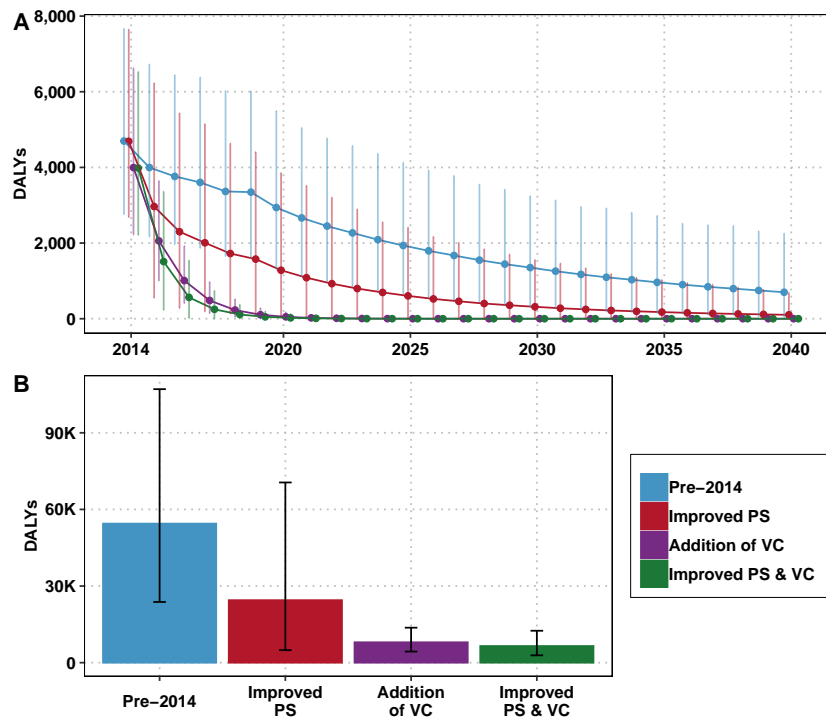

Figure A: Disability adjusted life-years (DALYs) accrued through time for different counterfactual strategies in the retrospective analysis.

| Strategies       | Costs<br>2014-2020 | Costs<br>2014-2040 | Proportion<br>spent |
|------------------|--------------------|--------------------|---------------------|
| Pre-2014         | 0.57 (0.43, 0.74)  | 1.67 (1.24, 2.20)  | 0.35 (0.31, 0.39)   |
| Improved PS      | 0.84 (0.67, 1.04)  | 2.51 (1.67, 3.28)  | 0.34 (0.28, 0.45)   |
| Addition of VC   | 0.89 (0.59, 1.27)  | 1.28 (0.86, 1.84)  | 0.70 (0.60, 0.72)   |
| Improved PS & VC | 1.13 (0.83, 1.51)  | 1.78 (1.30, 2.39)  | 0.63 (0.54, 0.67)   |

Table A: Costs spent vs total costs (in millions USD) for retrospective analysis. Means are given along with 95% prediction intervals (PIs).

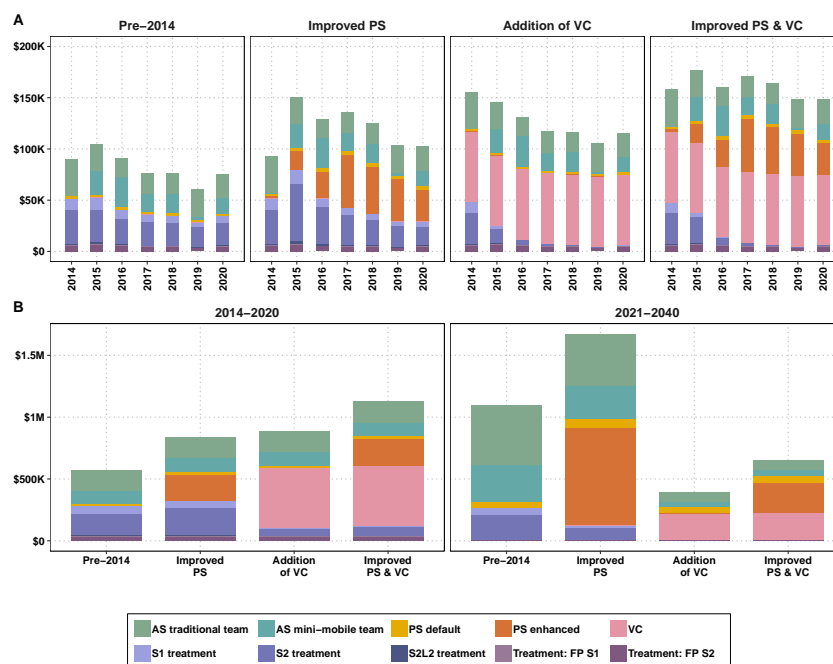

Figure B: Close-up of costs spent vs to spend in retrospective analysis. A) Costs spent by intervention for each strategy in 2014-2020. B) Costs spent vs those to be spent by activity. See table A for total estimates and uncertainty in each period.

### S3.2 Supplemental results for the prospective analysis

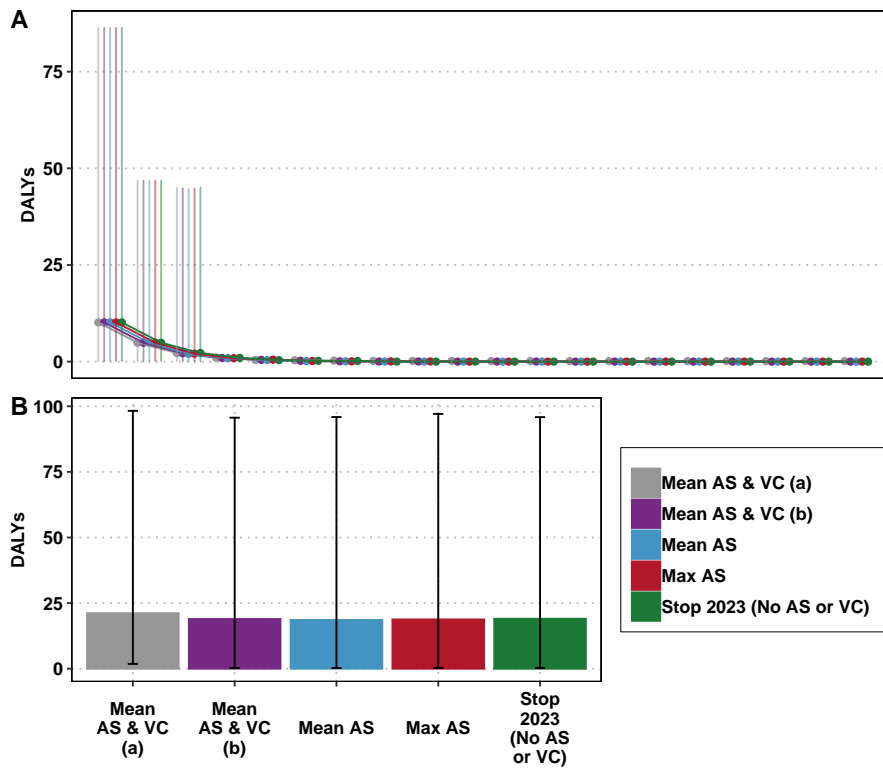

Figure C: Disability adjusted life-years (DALYs) accrued through time for different counterfactual strategies in the prospective analysis.

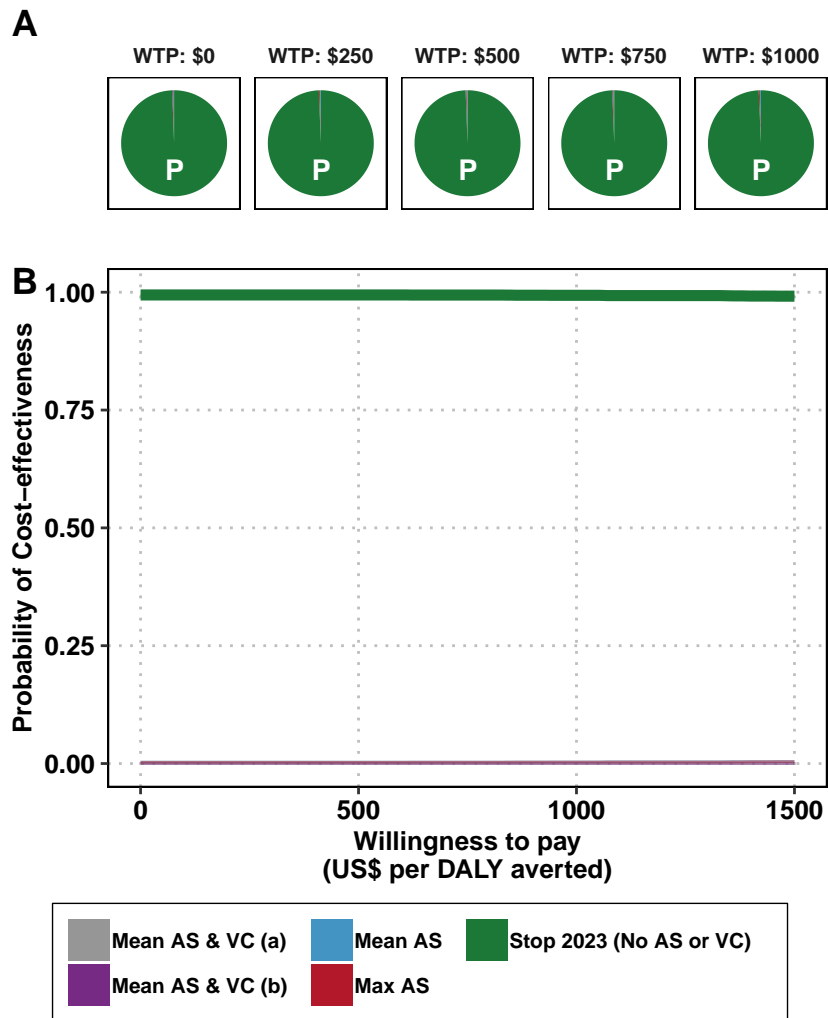

Figure D: Uncertainty in cost-effectiveness for prospective strategies. A) Pie graphs depicting the probability that each strategy is optimal. Strategies with the highest mean net monetary benefit are marked with a "P". B) Cost-effectiveness acceptability curves (CEACs) with the cost-effectiveness acceptability frontier (CEAFs) marked in bold.

### S3.3 Sensitivity analysis of time horizon and discounting rate

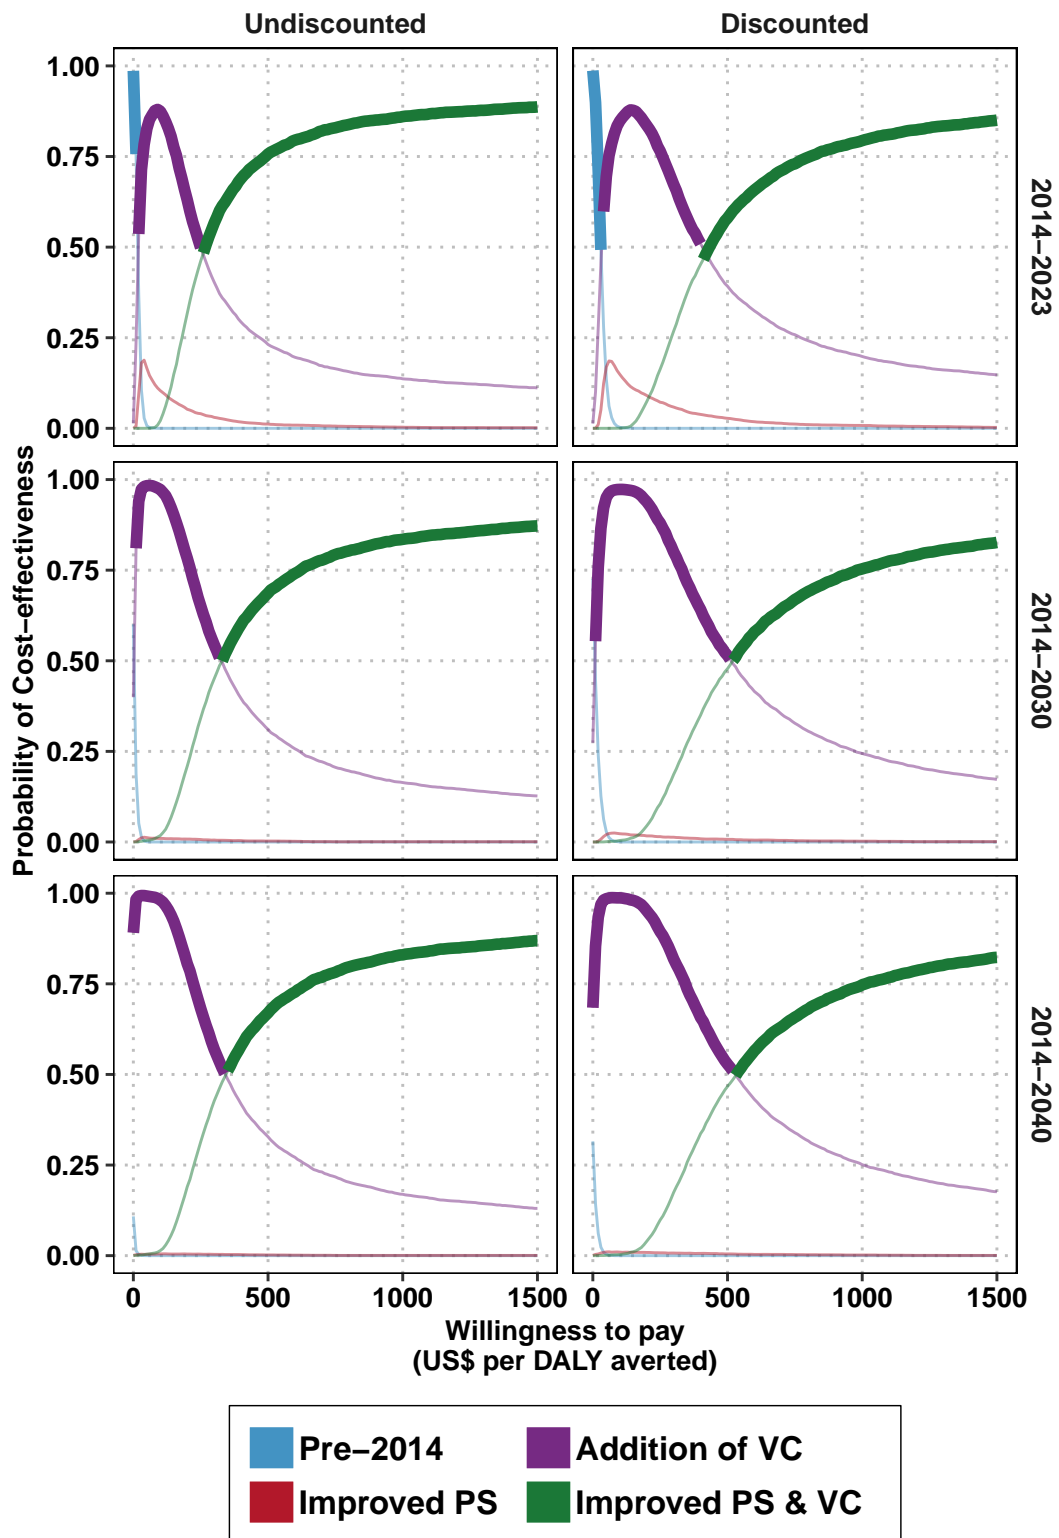

Figure E: Cost-effectiveness acceptability curves (CEACs) for retrospective strategies, sensitivity analysis with alternative horizons with the cost-effectiveness acceptability frontier (CEAFs) marked in bold.

### S3.4 Sensitivity analysis: results if fexinidazole had been available

|                                                                             | Pre-2014                 | Improved PS             | Addition of VC        | Improved PS & VC      |
|-----------------------------------------------------------------------------|--------------------------|-------------------------|-----------------------|-----------------------|
| <b>Health effects</b>                                                       |                          |                         |                       |                       |
| Reported cases                                                              | 1432 (694, 2538)         | 1066 (543, 1896)        | 185 (93, 315)         | 216 (115, 341)        |
| Deaths undetected                                                           | 1189 (520, 2365)         | 533 (102, 1525)         | 174 (95, 302)         | 142 (62, 272)         |
| Cases total                                                                 | 2620 (1256, 4880)        | 1598 (690, 3361)        | 359 (215, 556)        | 358 (208, 549)        |
| Deaths detected <sup>a</sup>                                                | 1 (0, 2)                 | 1 (0, 2)                | 0 (0, 0)              | 0 (0, 0)              |
| YLD                                                                         | 862 (458, 1551)          | 430 (168, 908)          | 111 (63, 187)         | 96 (49, 175)          |
| YLL                                                                         | 53,601 (23,117, 105,716) | 24,025 (4,616, 68,057)  | 7,865 (4,273, 13,621) | 6,411 (2,763, 12,273) |
| DALYs                                                                       | 54,463 (23,669, 107,167) | 24,455 (4,843, 68,885)  | 7,976 (4,383, 13,724) | 6,507 (2,867, 12,377) |
| <b>Costs, in thousands US\$</b>                                             |                          |                         |                       |                       |
| AS costs                                                                    | 1062 (771, 1425)         | 973 (579, 1378)         | 405 (293, 548)        | 406 (293, 561)        |
| PS costs                                                                    | 67 (38, 107)             | 1102 (710, 1585)        | 67 (38, 107)          | 547 (391, 753)        |
| VC costs                                                                    | 0 (0, 0)                 | 0 (0, 0)                | 695 (312, 1246)       | 698 (312, 1268)       |
| Treatment costs                                                             | 301 (147, 534)           | 256 (135, 447)          | 61 (35, 97)           | 72 (42, 112)          |
| Costs total                                                                 | 1429 (1081, 1852)        | 2330 (1542, 3061)       | 1228 (809, 1791)      | 1723 (1253, 2356)     |
| <b>EoT</b>                                                                  |                          |                         |                       |                       |
| Year of EoT                                                                 | After 2050               | 2043 (2029, After 2050) | 2015 (2015, 2015)     | 2015 (2015, 2015)     |
| Prob EoT 2030                                                               | <0.01                    | 0.06                    | >0.99                 | >0.99                 |
| <b>Cost-effectiveness without uncertainty (discounted)<sup>b</sup></b>      |                          |                         |                       |                       |
| DALYs averted                                                               | 0                        | 12,384                  | 19,942                | 20,720                |
| Costs averted                                                               | 0                        | 647,567                 | 38,408                | 441,938               |
| ICER                                                                        | Min Cost                 | Dominated               | 2                     | 519                   |
| <b>Cost-effectiveness with uncertainty, conditional on WTP<sup>c</sup>.</b> |                          |                         |                       |                       |
| WTP: \$0                                                                    | 0.53(p)                  | 0                       | 0.47                  | 0                     |
| WTP: \$250                                                                  | 0                        | 0.01                    | 0.89(p)               | 0.1                   |
| WTP: \$500                                                                  | 0                        | 0                       | 0.52(p)               | 0.47                  |
| WTP: \$750                                                                  | 0                        | 0                       | 0.33                  | 0.66(p)               |
| WTP: \$1000                                                                 | 0                        | 0                       | 0.25                  | 0.75(p)               |

<sup>a</sup> Detected deaths are those that occur due to treatment failure or loss-to-follow-up.

<sup>b</sup> Cost-effectiveness results are given for discounted DALYs and costs as per convention

<sup>c</sup> (p) is the preferred strategy; the strategy with the highest mean net monetary benefits

Table B: Sensitivity analysis if fexinidazole had been available since 2014. Summary of effects, costs, elimination of transmission (EoT) by 2030, and cost-effectiveness with and without uncertainty. Highlighted lines are the results that changed after simulating treatment with fexinidazole. Means are given along with 95% prediction intervals (PIs). YLL: years of life lost (to fatal disease), YLD: years of life lost to disability, DALYs: disability-adjusted life-years, PS: passive screening, AS: active screening, VC: vector control, ICER: incremental cost-effectiveness ratio, WTP: willingness to pay (USD per DALY averted), EoT: elimination of transmission.

### S3.5 Parameter-specific uncertainty analysis (retrospective analysis)

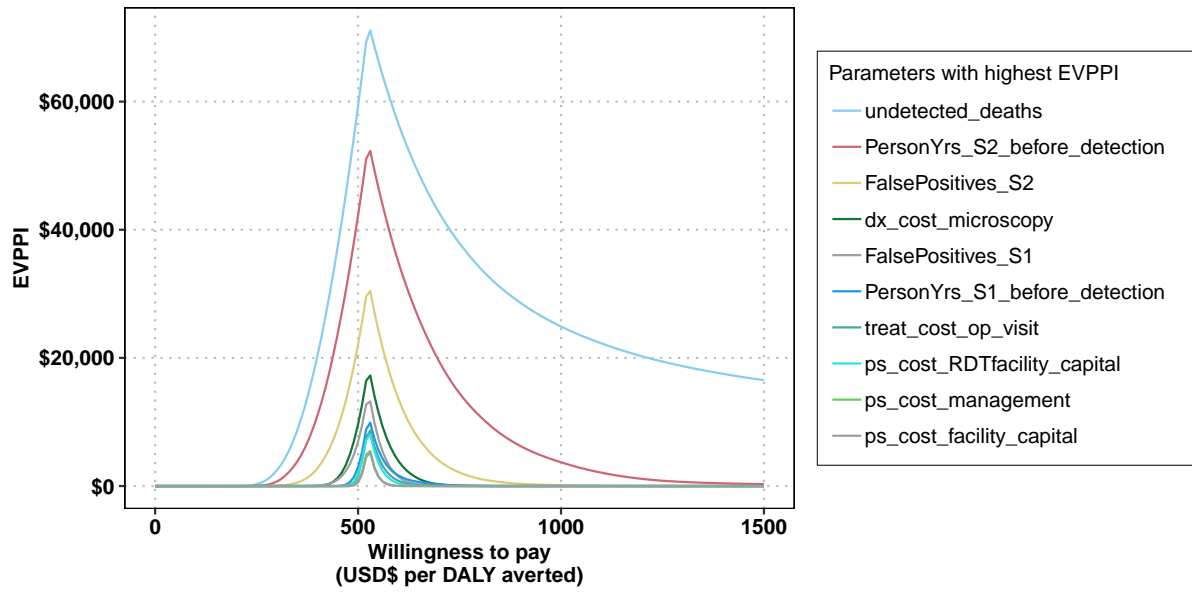

Figure F: Expected value of perfect partial information (EVPPI) for retrospective analysis.
